# Supplementary material for: Determination of contact ion-pair formation in CoCl2 aqueous, methanol, and ethanol dilute solutions by UV-vis and X-ray absorption spectroscopies
Source: Royal Society of Chemistry journal article supplement (doi:10.1039/d4nj03982c), 2024-01-01
Supplement: d4nj03982c1.pdf [file d4nj03982c1.pdf]

**Supporting Information:**

**Determination of Contact Ion-Pair Formation in  
CoCl<sub>2</sub> Aqueous, Methanol, and Ethanol Dilute  
Solutions by UV-vis and X-ray Absorption  
Spectroscopies**

Alessandro Tofoni, Matteo Busato,\* Irene Rigacci, Mauro Giustini, and Paola  
D'Angelo\*

*Department of Chemistry, Sapienza University of Rome, P.le Aldo Moro 5, 00185, Rome,  
Italy*

E-mail: [matteo.busato@uniroma1.it](mailto:matteo.busato@uniroma1.it); [p.dangelo@uniroma1.it](mailto:p.dangelo@uniroma1.it)

## Contents

|   |                                       |     |
|---|---------------------------------------|-----|
| 1 | Supplementary Figures (Figures S1-S5) | S-2 |
| 2 | Supplementary Tables (Tables S1 - S2) | S-8 |

## 1 Supplementary Figures (Figures S1-S5)

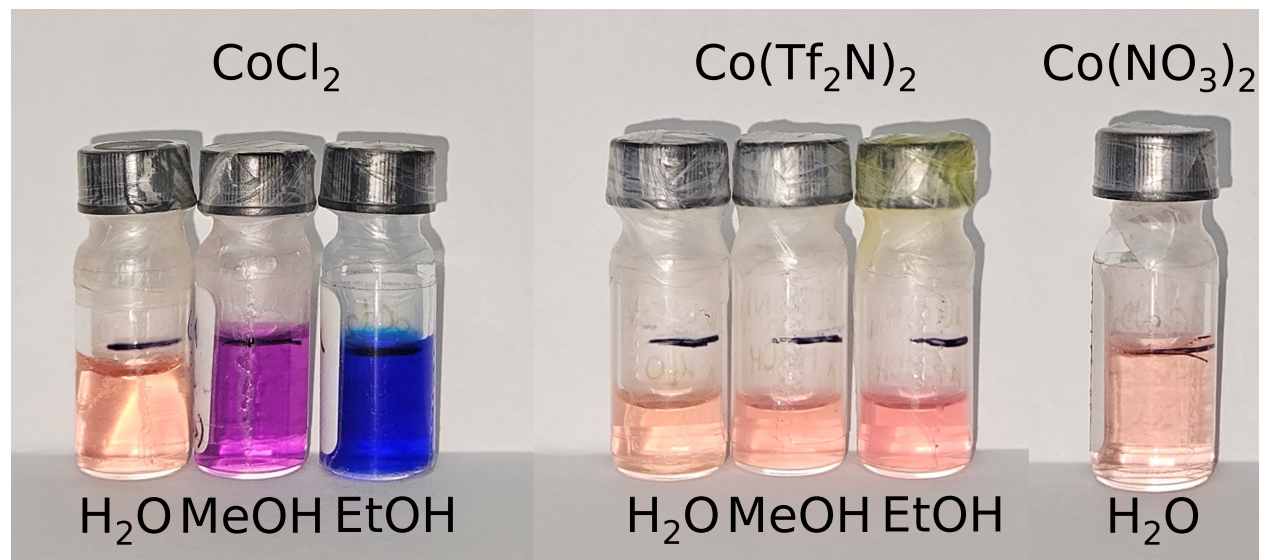

Figure S1: Photographs of the  $0.1 \text{ mol L}^{-1}$   $\text{CoCl}_2$ ,  $\text{Co}(\text{Tf}_2\text{N})_2$  ( $\text{Tf}_2\text{N} = (\text{CF}_3\text{SO}_2)_2\text{N}^-$ ), and  $\text{Co}(\text{NO}_3)_2$  aqueous, methanol ( $\text{MeOH}$ ), and ethanol ( $\text{EtOH}$ ) solutions investigated in this work.

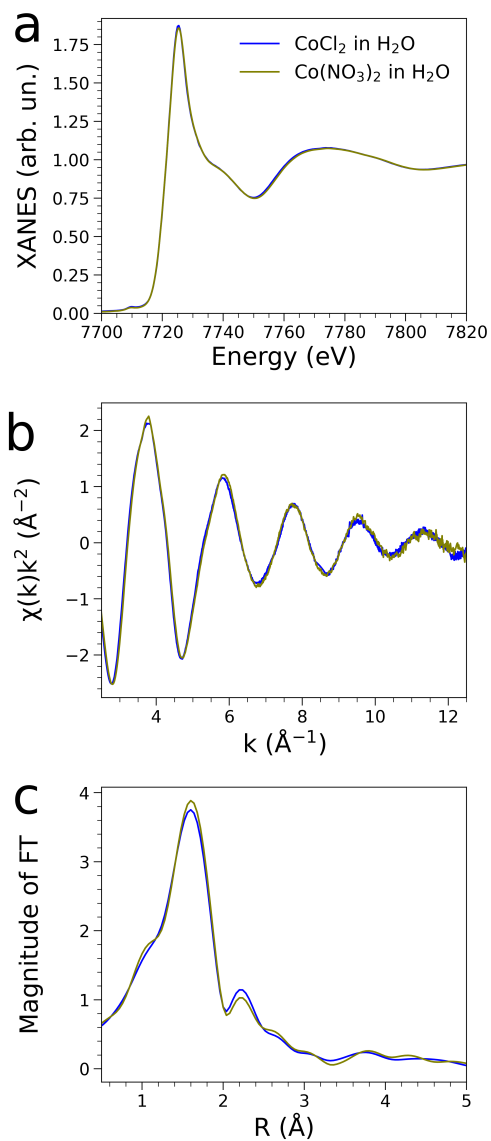

Figure S2: Co K-edge a) normalized X-ray absorption near edge structure (XANES), b) extended X-ray absorption fine structure (EXAFS), and c) non-phase shift-corrected Fourier Transform (FT) experimental spectra collected on the  $0.1 \text{ mol L}^{-1}$   $\text{CoCl}_2$  and  $\text{Co}(\text{NO}_3)_2$  aqueous solutions. The FT's have been calculated in the  $2.3 - 12.0 \text{ \AA}^{-1}$   $k$ -range.

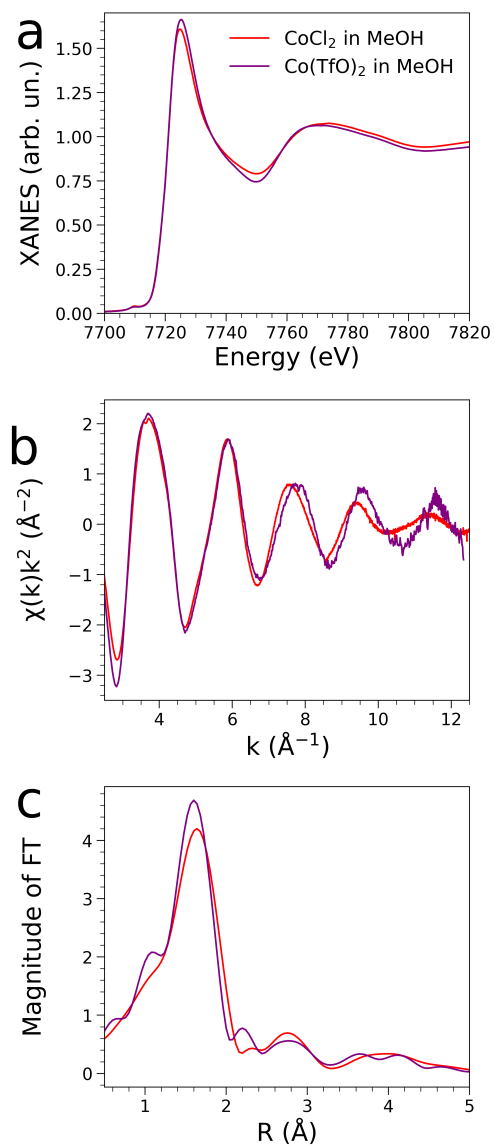

Figure S3: Co K-edge a) normalized XANES, b) EXAFS, and b) non-phase shift-corrected FT experimental spectra collected on the  $0.1 \text{ mol L}^{-1}$   $\text{CoCl}_2$  and  $\text{Co}(\text{TfO})_2$  ( $\text{TfO} = \text{CF}_3\text{SO}_3^-$ ) solutions in MeOH. The FT's have been calculated in the  $2.3 - 12.0 \text{ \AA}^{-1}$   $k$ -range.

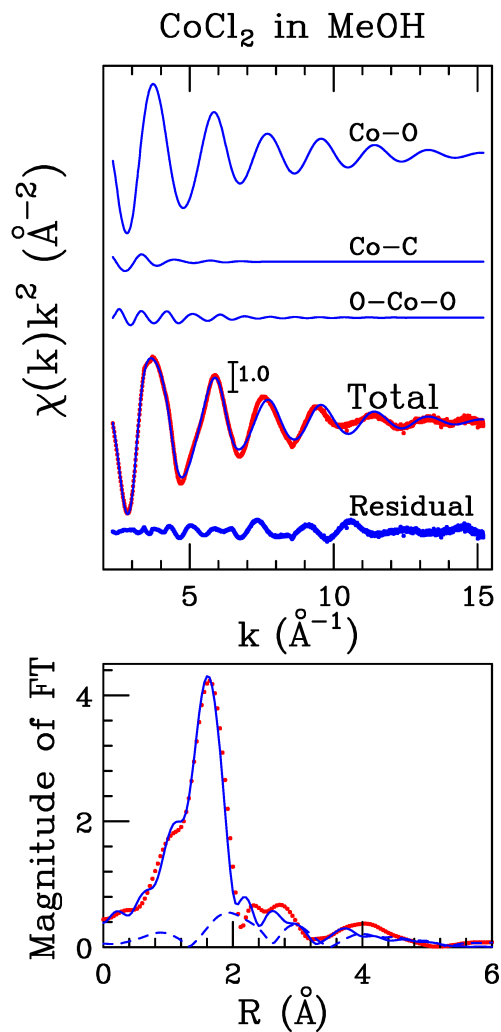

Figure S4: Analysis of the Co K-edge EXAFS spectrum collected on the 0.1 mol L<sup>-1</sup> CoCl<sub>2</sub> solution in MeOH carried out assuming six-fold MeOH coordination. Upper panel: best-fit single-scattering (SS) and multiple-scattering (MS) theoretical signals, together with the total theoretical contribution (blue lines) compared with the experimental data (red dots) and the resulting residuals (blue dots). Lower panel: non-phase shift-corrected FT's of the best-fit theoretical signal (blue line), of the experimental data (red dots), and of the residuals (blue fragmented line).

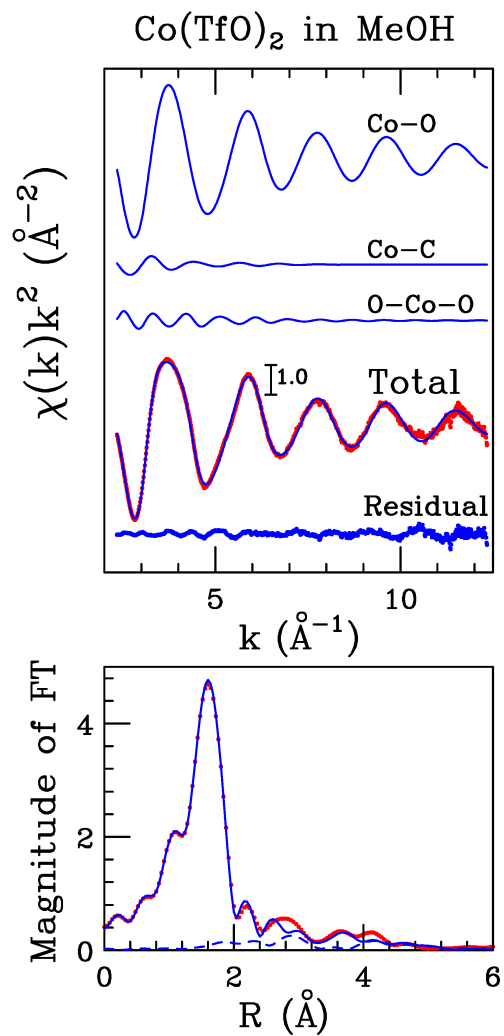

Figure S5: Analysis of the Co K-edge EXAFS spectrum collected on the 0.1 mol L<sup>-1</sup> Co(TfO)<sub>2</sub> solution in MeOH. Upper panel: best-fit SS and MS theoretical signals, together with the total theoretical contribution (blue lines) compared with the experimental data (red dots) and the resulting residuals (blue dots). Lower panel: non-phase shift-corrected FT's of the best-fit theoretical signal (blue line), of the experimental data (red dots), and of the residuals (blue fragmented line).

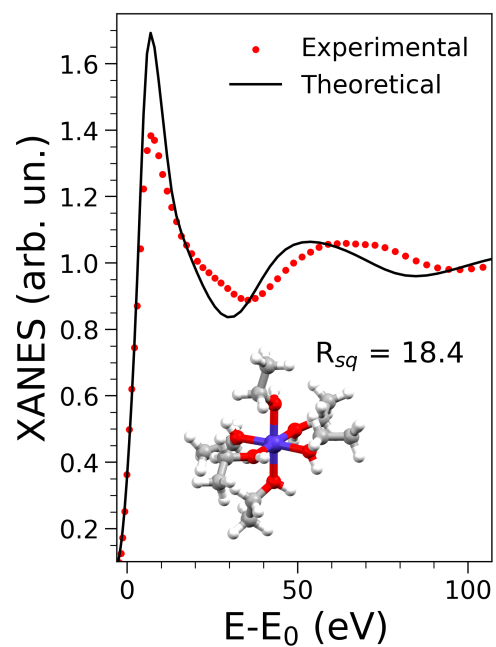

Figure S6: Experimental Co K-edge XANES spectrum of the  $0.1 \text{ mol L}^{-1}$   $\text{CoCl}_2$  solution in EtOH (red dots) compared with the MXAN best-fit calculations for the  $[\text{Co}(\text{EtOH})_6]^{2+}$  cluster (black full line). The residual function  $R_{sq}$  is reported together with the optimized cluster (cobalt is purple, oxygen is red, carbon is gray, and hydrogen is white).

## 2 Supplementary Tables (Tables S1 - S2)

Table S1: List of the prepared 0.1 mol L<sup>-1</sup> cobalt salt solutions.

| Salt                               | Solvent |
|------------------------------------|---------|
| CoCl <sub>2</sub>                  | Water   |
| Co(NO <sub>3</sub> ) <sub>2</sub>  | Water   |
| Co(Tf <sub>2</sub> N) <sub>2</sub> | Water   |
| CoCl <sub>2</sub>                  | MeOH    |
| Co(TfO) <sub>2</sub>               | MeOH    |
| Co(Tf <sub>2</sub> N) <sub>2</sub> | MeOH    |
| CoCl <sub>2</sub>                  | EtOH    |
| Co(Tf <sub>2</sub> N) <sub>2</sub> | EtOH    |

Table S2: Best-fit structural parameters for the two-body distributions obtained from the EXAFS analysis of the 0.1 mol L<sup>-1</sup> Co(TfO)<sub>2</sub> solution in MeOH.  $N$  is the coordination number,  $R$  the average distance,  $\sigma^2$  the Debye-Waller factor, and  $\beta$  the asymmetry index.

|                              |      | $N$    | $R$ (Å) | $\sigma^2$ (Å <sup>-2</sup> ) | $\beta$ |
|------------------------------|------|--------|---------|-------------------------------|---------|
| Co(TfO) <sub>2</sub> in MeOH | Co-O | 6.0(3) | 2.09(2) | 0.002(2)                      | 0.3(1)  |
|                              | Co-C | 6.0(6) | 3.36(5) | 0.028(6)                      | 0.0(3)  |
